# Supplementary material
Source: publisher figshare collection journal article supplement (https://karger.figshare.com/ndownloader/files/26603096)
Supplement: Supplementary file 1 [file 26603096]

| Supplementary table 1. Summary of 81 SNPs and the association with disease-free survival | | | | | | | |
| --- | --- | --- | --- | --- | --- | --- | --- |
|  |  |  |  |  | Disease Free survival, *P-value* a | | |
| ID No. | Alleles | MAF | HWE-*p* | CR(%) | Dominant | Recessive | Codominant |
| rs11265425 | T>G | 0.45 | 0.45 | 96.5 | 0.37 | 0.05 | 0.60 |
| rs10400291 | C>A | 0.37 | 0.54 | 97.3 | 0.92 | 0.03 | 0.22 |
| rs2682563 | T>C | 0.09 | 0.76 | 98.1 | 0.30 | 0.13 | 0.21 |
| rs1592937 | G>A | 0.47 | 0.09 | 96.9 | 0.62 | 0.32 | 0.38 |
| rs2955232 | A>C | 0.33 | 0.37 | 98.6 | 0.84 | 0.11 | 0.37 |
| rs6953538 | G>A | 0.47 | 0.65 | 98.1 | 0.87 | 0.88 | 0.84 |
| rs3896063 | C>T | 0.41 | 0.39 | 97.2 | 0.51 | 0.98 | 0.66 |
| rs6766403 | G>A | 0.26 | 0.42 | 99.1 | 0.68 | 0.08 | 0.70 |
| rs4907302 | C>G | 0.31 | 0.72 | 98.7 | 0.72 | 0.99 | 0.79 |
| rs7245838 | T>G | 0.34 | 0.48 | 97.2 | 0.21 | 0.79 | 0.30 |
| rs2999617 | T>C | 0.26 | 0.23 | 99.1 | 0.16 | 0.99 | 0.30 |
| rs2617834 | T>C | 0.43 | 0.30 | 97.7 | 0.93 | 0.14 | 0.45 |
| rs7562498 | G>C | 0.27 | 0.33 | 98.0 | 0.11 | 0.46 | 0.11 |
| rs604845 | C>T | 0.25 | 0.35 | 98.9 | 0.39 | 0.34 | 0.29 |
| rs4815608 | G>A | 0.48 | 0.25 | 96.8 | 0.78 | 0.90 | 0.92 |
| rs9744242 | C>T | 0.24 | 0.09 | 98.9 | 0.35 | 0.15 | 0.96 |
| rs1864507 | T>C | 0.34 | 0.30 | 99.1 | 0.07 | 0.52 | 0.10 |
| rs743024 | T>C | 0.45 | 0.17 | 97.7 | 0.18 | 0.07 | 0.06 |
| rs3778914 | C>A | 0.36 | 0.71 | 99.1 | 0.08 | 0.51 | 0.11 |
| rs1870086 | T>G | 0.43 | 0.69 | 97.1 | 0.08 | 0.99 | 0.25 |
| rs11083627 | A>G | 0.50 | 0.10 | 96.6 | 0.09 | 0.47 | 0.57 |
| rs2735515 | G>A | 0.15 | 0.98 | 97.7 | 0.15 | 0.06 | 0.07 |
| rs6509214 | G>T | 0.43 | 0.33 | 97.7 | 0.08 | 0.57 | 0.13 |
| rs10277874 | T>C | 0.27 | 0.24 | 98.3 | 0.32 | 0.12 | 0.15 |
| rs11153277 | C>A | 0.45 | 0.61 | 98.6 | 0.37 | 0.36 | 0.27 |
| rs12091564 | A>G | 0.27 | 0.91 | 98.9 | 0.93 | 0.51 | 0.82 |
| rs2290655 | G>C | 0.19 | 0.82 | 98.9 | 0.79 | 0.39 | 0.95 |
| rs2301811 | T>G | 0.36 | 0.54 | 98.0 | 0.58 | 0.91 | 0.72 |
| rs290444 | G>A | 0.36 | 0.38 | 98.9 | 0.14 | 0.57 | 0.45 |
| rs4320660 | G>A | 0.40 | 0.05 | 98.0 | 0.73 | 0.39 | 0.49 |
| rs4846216 | T>A | 0.41 | 0.77 | 99.4 | 0.27 | 0.14 | 0.12 |
| rs6504573 | T>C | 0.20 | 0.71 | 99.7 | 0.26 | 0.79 | 0.29 |
| rs847377 | C>T | 0.18 | 0.31 | 99.7 | 0.85 | 0.77 | 0.93 |
| rs9304687 | T>G | 0.48 | 0.76 | 97.1 | 0.64 | 0.93 | 0.73 |
| rs10194430 | G>A | 0.20 | 0.07 | 98.9 | 0.91 | 0.58 | 0.96 |
| rs1107179 | T>G | 0.18 | 0.16 | 99.4 | 0.13 | 0.98 | 0.19 |
| rs11680096 | C>T | 0.27 | 0.84 | 98.0 | 0.87 | 0.62 | 0.94 |
| rs11766433 | G>A | 0.49 | 0.10 | 99.1 | 0.31 | 0.47 | 0.30 |
| rs12051 | A>G | 0.21 | 0.47 | 99.1 | 0.37 | 0.56 | 0.33 |
| rs1253103 | G>C | 0.18 | 0.51 | 99.1 | 0.17 | 0.35 | 0.13 |
| rs1800734 | A>G | 0.46 | 0.53 | 97.4 | 0.10 | 0.52 | 0.14 |
| rs28580554 | G>A | 0.38 | 0.12 | 96.6 | 0.72 | 0.98 | 0.78 |
| rs3816778 | C>G | 0.49 | 0.24 | 97.1 | 0.84 | 0.52 | 0.61 |
| rs4651259 | G>A | 0.45 | 0.83 | 97.1 | 0.71 | 0.77 | 0.68 |
| rs751731 | G>A | 0.33 | 0.60 | 98.0 | 0.20 | 0.40 | 0.18 |
| rs823114 | G>A | 0.49 | 0.54 | 96.3 | 0.65 | 0.61 | 0.56 |
| rs9468830 | G>T | 0.35 | 0.38 | 96.8 | 0.92 | 0.22 | 0.60 |
| rs10097936 | A>G | 0.45 | 0.18 | 95.7 | 0.73 | 0.40 | 0.50 |
| rs10747783 | C>T | 0.30 | 0.53 | 96.8 | 0.79 | 0.69 | 0.70 |
| rs12188417 | T>G | 0.28 | 0.44 | 96.6 | 0.37 | 0.92 | 0.52 |
| rs12462084 | C>A | 0.09 | 0.98 | 96.3 | 0.90 | 0.59 | 0.99 |
| rs17409602 | T>C | 0.19 | 0.73 | 96.8 | 0.41 | 0.87 | 0.43 |
| rs2544800 | A>G | 0.26 | 0.29 | 96.6 | 0.90 | 0.89 | 0.98 |
| rs37254 | C>T | 0.41 | 0.07 | 96.0 | 0.65 | 0.31 | 0.39 |
| rs481298 | G>A | 0.26 | 0.97 | 97.1 | 0.57 | 0.94 | 0.62 |
| rs6926221 | G>A | 0.32 | 0.93 | 97.7 | 0.97 | 0.65 | 0.86 |
| rs16956600 | C>T | 0.16 | 0.36 | 96.0 | 0.27 | 0.39 | 0.22 |
| rs2304631 | T>A | 0.25 | 0.20 | 96.0 | 0.10 | 0.98 | 0.17 |
| rs3098659 | T>C | 0.46 | 0.16 | 96.6 | 0.39 | 0.62 | 0.78 |
| rs3741470 | A>G | 0.41 | 0.73 | 98.9 | 0.59 | 0.71 | 0.56 |
| rs4932371 | T>C | 0.15 | 0.47 | 99.7 | 0.99 | 0.43 | 0.81 |
| rs4951389 | T>G | 0.33 | 0.59 | 98.9 | 0.31 | 1.00 | 0.44 |
| rs7333246 | C>G | 0.28 | 0.24 | 98.0 | 0.99 | 0.74 | 0.87 |
| rs999798 | A>G | 0.17 | 0.43 | 98.9 | 0.94 | 0.90 | 0.98 |
| rs10145275 | C>T | 0.22 | 0.33 | 97.1 | 0.24 | 0.47 | 0.22 |
| rs10985070 | A>C | 0.47 | 0.08 | 98.6 | 0.60 | 0.11 | 0.21 |
| rs11591030 | T>C | 0.12 | 0.49 | 98.0 | 0.94 | 0.84 | 0.90 |
| rs1865053 | T>C | 0.36 | 0.82 | 97.4 | 0.67 | 0.65 | 0.94 |
| rs321600 | G>A | 0.11 | 0.62 | 98.3 | 0.92 | 0.61 | 0.95 |
| rs3796302 | G>A | 0.33 | 0.98 | 97.1 | 0.26 | 0.56 | 0.26 |
| rs4318227 | C>G | 0.42 | 0.84 | 96.3 | 0.92 | 0.77 | 0.82 |
| rs436827 | A>T | 0.30 | 0.74 | 96.8 | 0.35 | 0.78 | 0.54 |
| rs460186 | G>A | 0.19 | 0.81 | 97.7 | 0.93 | 0.97 | 0.95 |
| rs7257602 | A>G | 0.49 | 0.88 | 95.1 | 0.12 | 0.59 | 0.20 |
| rs7480668 | A>G | 0.46 | 0.60 | 97.7 | 0.54 | 0.91 | 0.74 |
| rs7525113 | C>T | 0.25 | 0.76 | 99.7 | 0.99 | 0.34 | 0.69 |
| rs8113650 | A>G | 0.38 | 0.26 | 97.7 | 0.28 | 0.66 | 0.59 |
| rs831629 | G>A | 0.50 | 0.87 | 98.6 | 0.48 | 0.53 | 0.41 |
| rs3828960 | G>A | 0.49 | 0.86 | 97.4 | 0.64 | 0.49 | 0.49 |
| rs4385801 | G>T | 0.29 | 0.98 | 96.3 | 0.20 | 0.67 | 0.23 |
| rs4984682 | G>C | 0.31 | 0.81 | 98.0 | 0.62 | 0.35 | 0.95 |
| Abbreviations: ID no, identification number; SNP, single nucleotide polymorphism; MAF, minor allele frequency; HWE, Hardy-Weinberg equilibrium; CR, call rate.  a*P*-values were calculated using multivariate Cox proportional hazard models, adjusted for age, gender, smoking status, tumor histology, pathologic stage and adjuvant therapy. | | | | | | | |
